# Supplementary material for: Spatial distribution modelling of Culicoides (Diptera: Ceratopogonidae) biting midges, potential vectors of African horse sickness and bluetongue viruses in Senegal
Source: PubMed Central journal article supplement (PMC5994048; doi:10.1186/s13071-018-2920-7), 2018-06-08

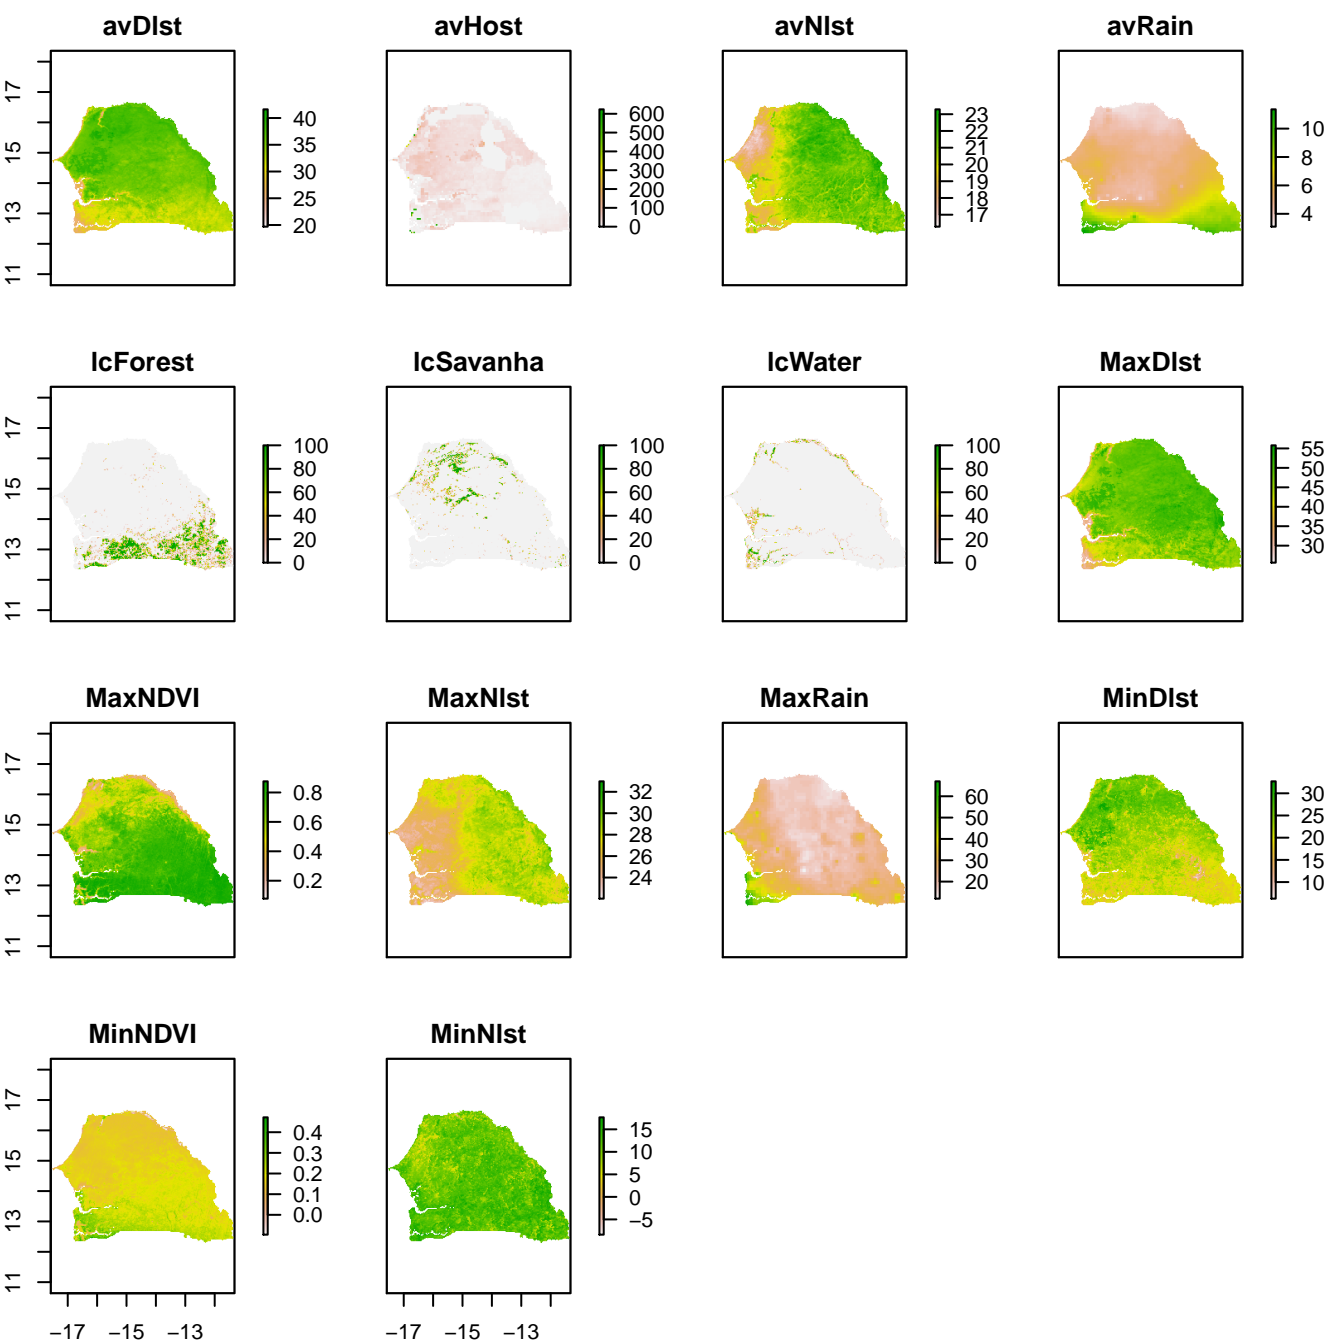

Supplement: 13071_2018_2920_MOESM2_ESM.pdf [file 13071_2018_2920_MOESM2_ESM.pdf]
